# Supplementary material for: Monitoring and Regulating Intracellular GPX4 mRNA Using Gold Nanoflare Probes and Enhancing Erastin-Induced Ferroptosis
Source: MDPI journal article supplement (doi:10.3390/bios12121178), 2022-12-17
Supplement: s1 [file s1]

# Monitoring and Regulating Intracellular GPX4 mRNA Using Gold Nanoflare Probes and Enhancing Erastin-Induced Ferroptosis

Xiaoyan Liu <sup>1,†</sup>, Qiangqiang Yang <sup>1,†</sup>, Yanan Sui <sup>1</sup>, Qiaoli Yue <sup>1</sup>, Shuqing Yan <sup>1</sup>, Chuan Li <sup>1</sup> and Min Hong <sup>1,2,\*</sup>

<sup>1</sup> School of Chemistry and Chemical Engineering, Liaocheng University, Liaocheng 252059, China

<sup>2</sup> Shandong Harway Pharma Co., Ltd., Dongying 257000, China

\* Correspondence: hongmin@lcu.edu.cn; Tel.: +86-635-823-9195; Fax: +86-635-823-9121

† These authors contributed equally to this work.

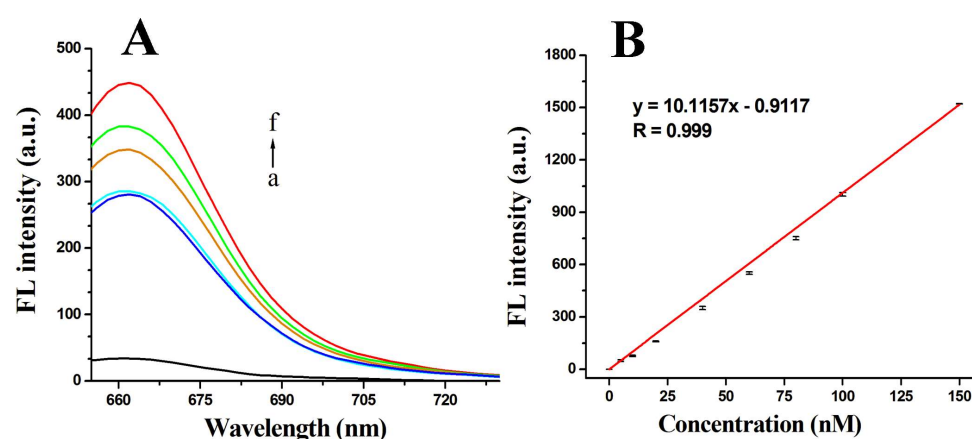

**Figure S1.** (A) Fluorescence recovery of AuNF-probes incubated with different concentrations of mercaptoethanol (0, 0.2, 0.5, 1, 20, 50  $\mu$ M). (B) Standard curves of the fluorescence intensity of HS-DNA/Flare-DNA duplexes (0, 5, 10, 20, 40, 60, 80, 100, 150 nM).

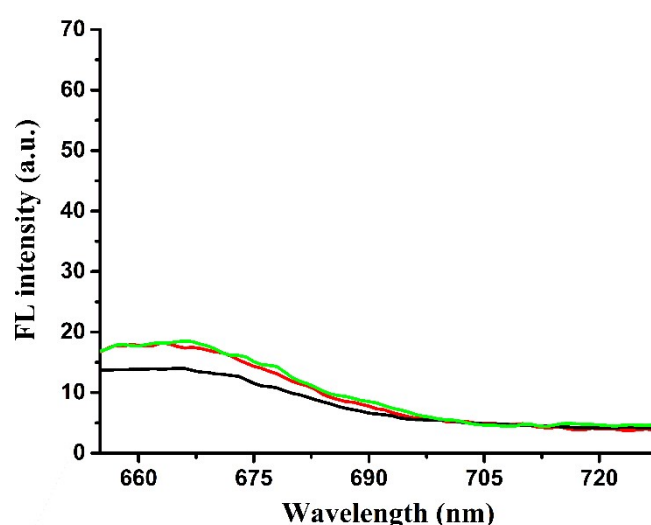

**Figure S2.** Fluorescence spectra of AuNF-probes incubated with different concentrations of Random-DNA (0, 100, 300 nM).

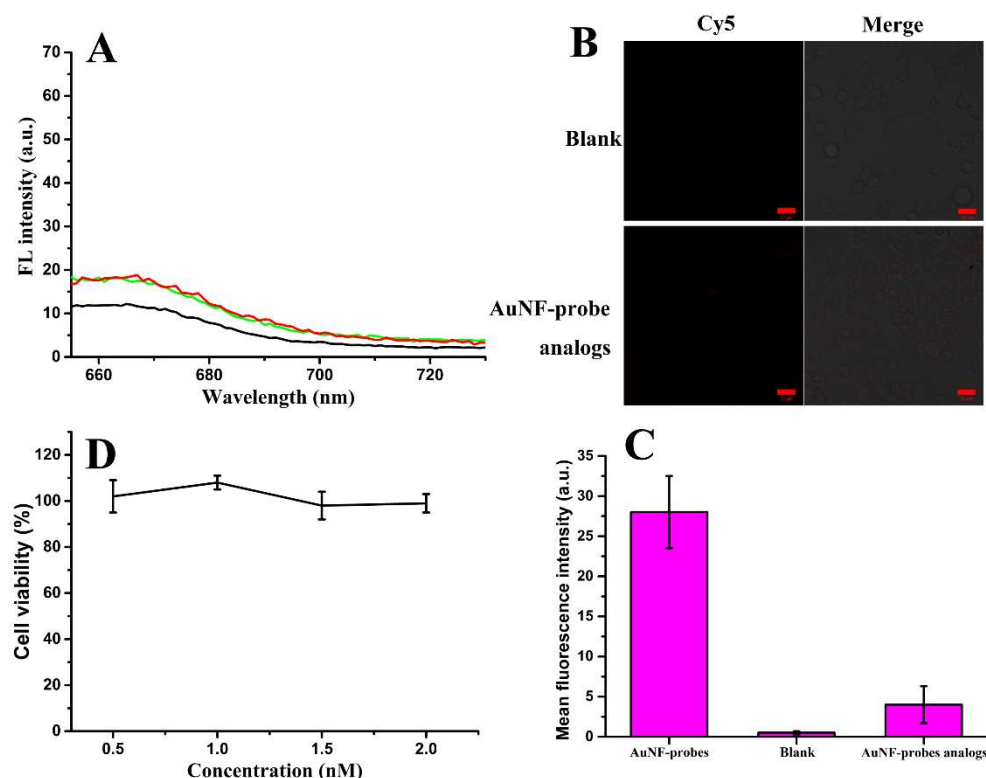

**Figure S3.** (A) Fluorescence spectra of AuNF-probe analogs incubated with different concentrations of Target-DNA (0, 100, 300 nM). (B) Confocal fluorescence images of HeLa cells that were treated with or without AuNF-probe analogs (1.5 nM) for 4 h. (C) Mean fluorescence intensity of HeLa cells that shown in Figures S2B and 4A. (D) Viabilities of HeLa cells when treated with different concentrations of AuNF-probe analogs (0.5, 1.0, 1.5, 2.0 nM) for 48 h.

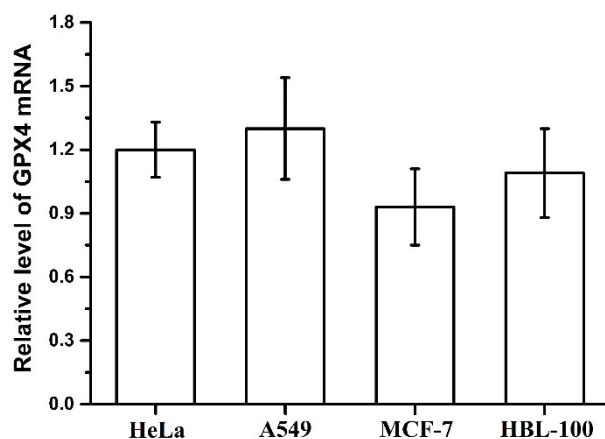

**Figure S4.** qRT-PCR analysis of GPX4 mRNA content in HeLa, A549, MCF-7, and HBL-100 cells.

**Table S1.** IC<sub>50</sub> values of erastin against five different cancer cell lines.

|         | HeLa        | A549        | HepG2       | MCF-7        | MDA-MB-231   |
|---------|-------------|-------------|-------------|--------------|--------------|
| erastin | 2.32 ± 0.34 | 5.41 ± 0.34 | 3.83 ± 0.64 | 10.89 ± 0.23 | 10.24 ± 0.42 |

**Table S2.** Inhibition rate of different systems on the proliferation of different cancer cells at 48 h.

|                       | HeLa         | A549         | HepG2        | MCF-7        | MDA-MB-231   |
|-----------------------|--------------|--------------|--------------|--------------|--------------|
| AuNF-probes           | 8.41 ± 5.06  | 16.62 ± 2.98 | 8.46 ± 3.06  | 5.58 ± 4.76  | 3.66 ± 2.76  |
| erastin               | 24.12 ± 6.11 | 49.54 ± 4.72 | 54.81 ± 4.11 | 3.69 ± 8.15  | 12.58 ± 9.14 |
| AuNF-probes + erastin | 57.19 ± 4.17 | 63.18 ± 3.17 | 68.19 ± 3.17 | 25.32 ± 3.66 | 39.65 ± 5.69 |
